# Supplementary material
Source: ML conference proceedings conference paper supplement (https://openaccess.thecvf.com/content/ICCV2023/html/He_Speech4Mesh_Speech-Assisted_Monocular_ICCV_2023_paper.html)
Supplement: Supplementary file 2 [file He_Speech4Mesh_Speech-Assisted_Monocular_ICCV_2023_supplemental.zip]

Archive with 2 entries (2 files):
- suppl-file.pdf
- suppl-video.mp4
